# Supplementary material for: A New Norisoprenoid and Other Compounds from Fuzhuan Brick Tea
Source: Molecules. 2012 Mar 19;17(3):3539–46. doi: 10.3390/molecules17033539 (PMC6268391; doi:10.3390/molecules17033539)
Supplement: Supplementary file 1 [file molecules-17-03539-s001.pdf]

# Supplementary Materials

Article

## A New Norisoprenoid and Other Compounds from Fuzhuan Brick Tea

Zhen-Mei Luo <sup>1,†</sup>, Tie-Jun Ling <sup>1,†</sup>, Li-Xiang Li <sup>1</sup>, Zheng-Zhu Zhang <sup>1</sup>, Hong-Tao Zhu <sup>2</sup>, Ying-Jun Zhang <sup>2,\*</sup> and Xiao-Chun Wan <sup>1,\*</sup>

<sup>1</sup> Key Laboratory of Tea Biochemical and Biotechnology of Ministry of Education and Ministry of Agriculture, Anhui Agricultural University, Hefei 230036, China;

E-Mails: yeziluozenmei@126.com (Z.-M.L.); ling\_tiejun@yahoo.com.cn (T.-J.L.)

<sup>2</sup> State Key Laboratory of Phytochemistry and Plant Resources in West China, Kunming Institute of Botany, Chinese Academy of Sciences, Kunming 650204, China

<sup>†</sup> These authors contributed equally to the work.

\* Authors to whom correspondence should be addressed: E-Mails: zhangyj@mail.kib.ac.cn (Y.-J.Z.); xcwan@ahau.edu.cn (X.-C.W.); Tel.: +86-871-522-3235 (Y.-J.Z.); Fax: +86-871-515-0124 (Y.-J.Z.); Tel./Fax: +86-551-578-6765 (X.-C.W.).

---

The supplementary materials for the manuscript:

*A new norisoprenoid derivative and other compounds from Fuzhuan brick tea*

<sup>1</sup>H NMR spectrum:

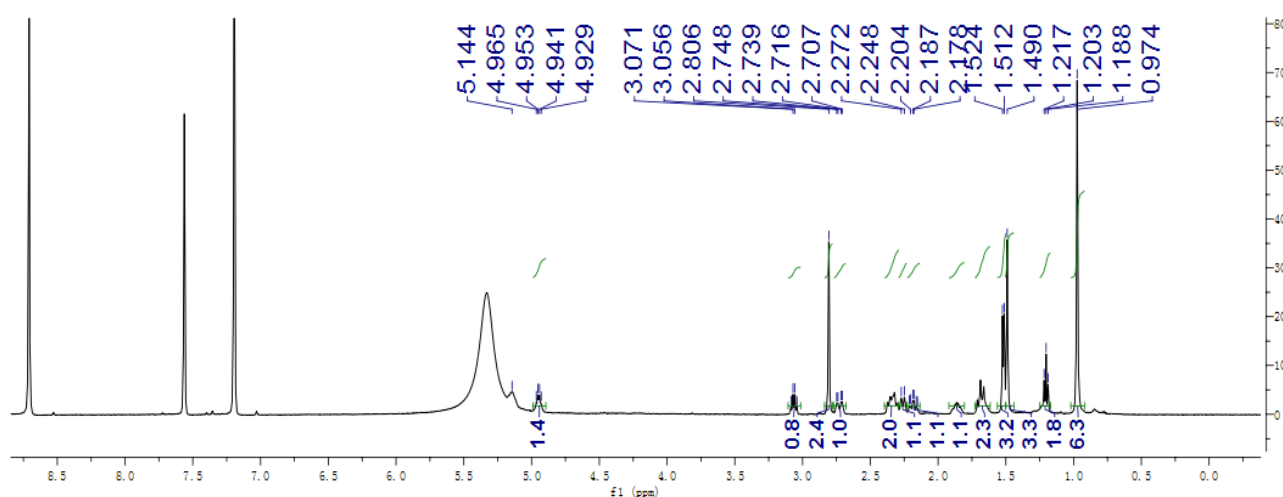

$^{13}\text{C}$  NMR spectrum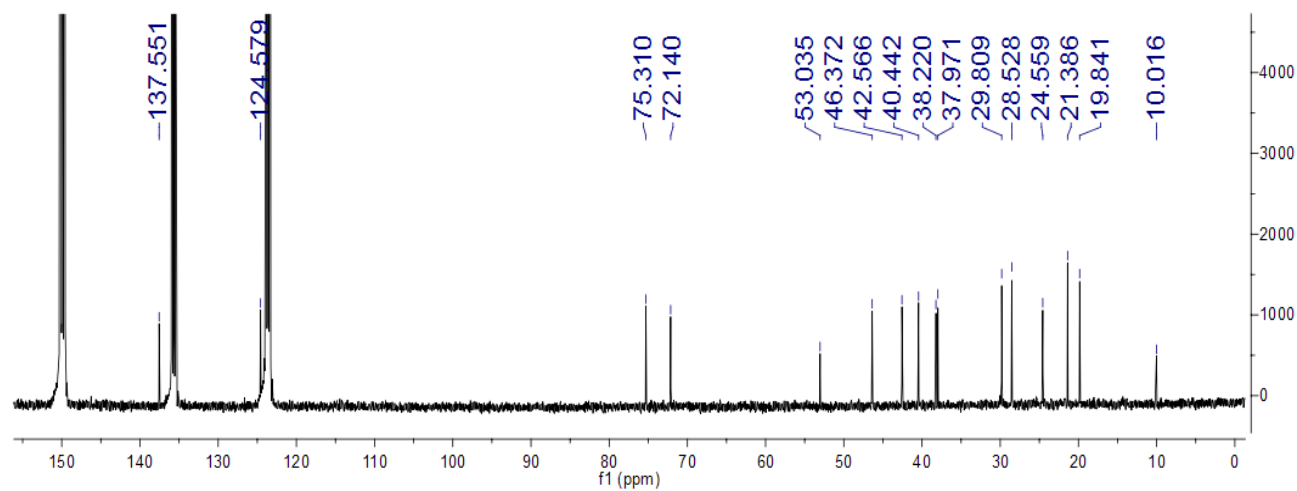

## DEPT 135

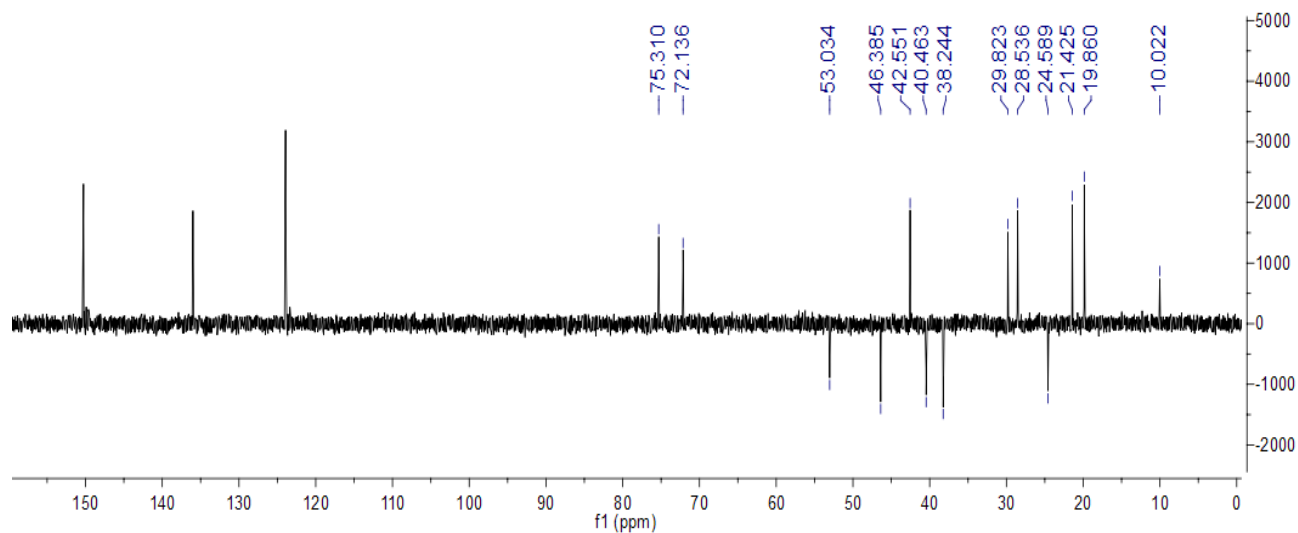

## DEPT 90

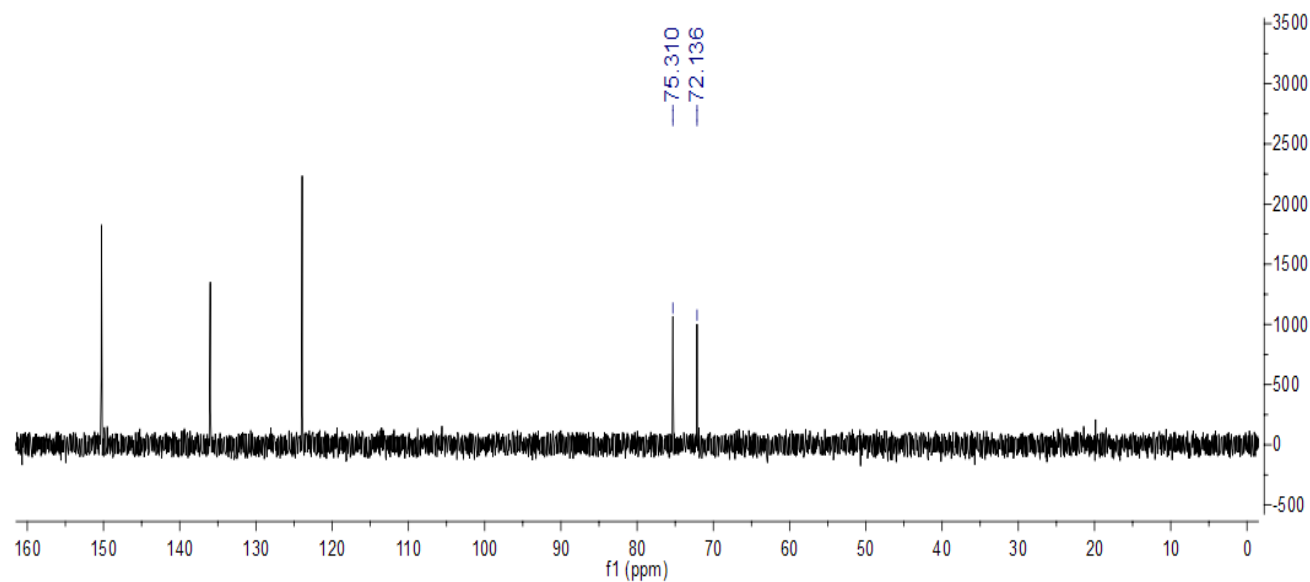

## ROESY

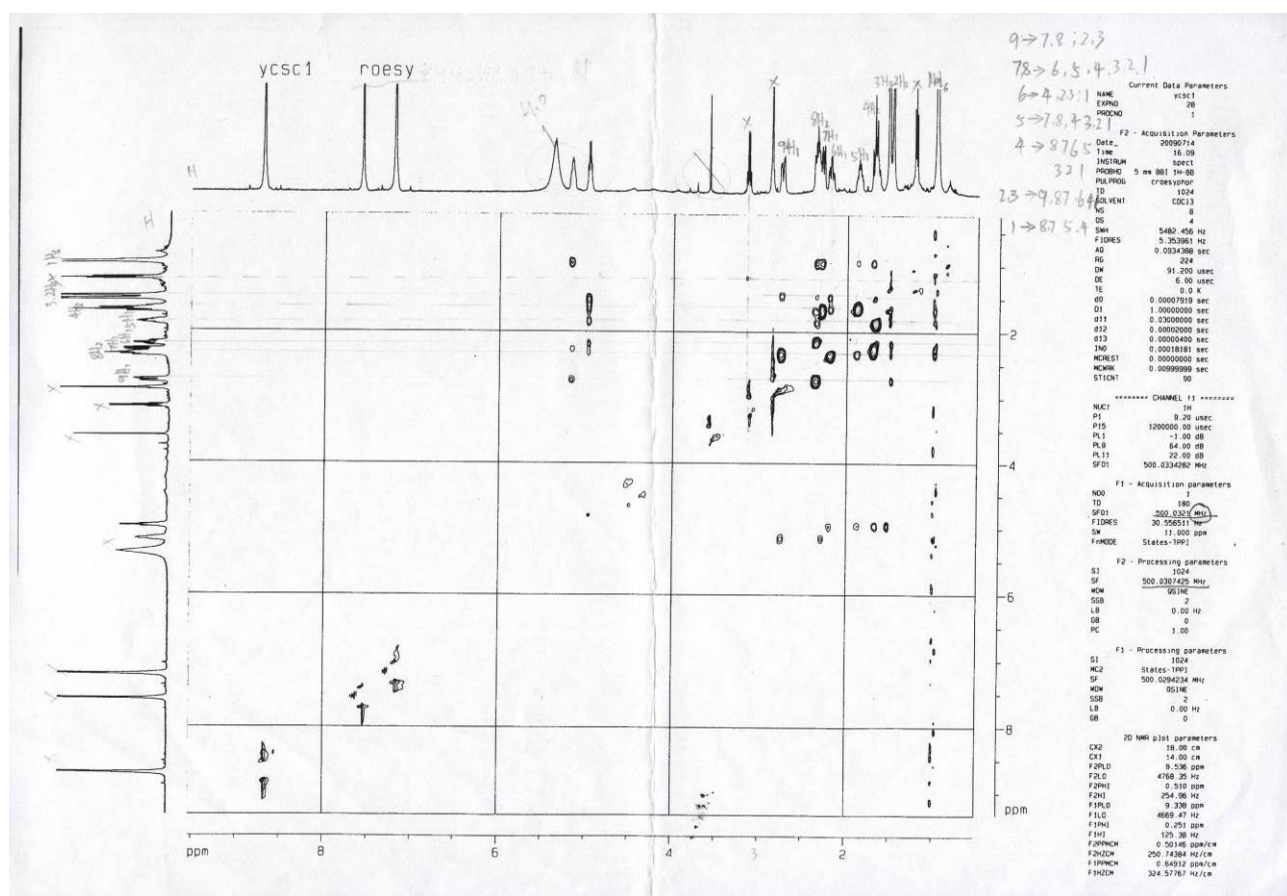 $^1\text{H}$ - $^1\text{H}$  COSY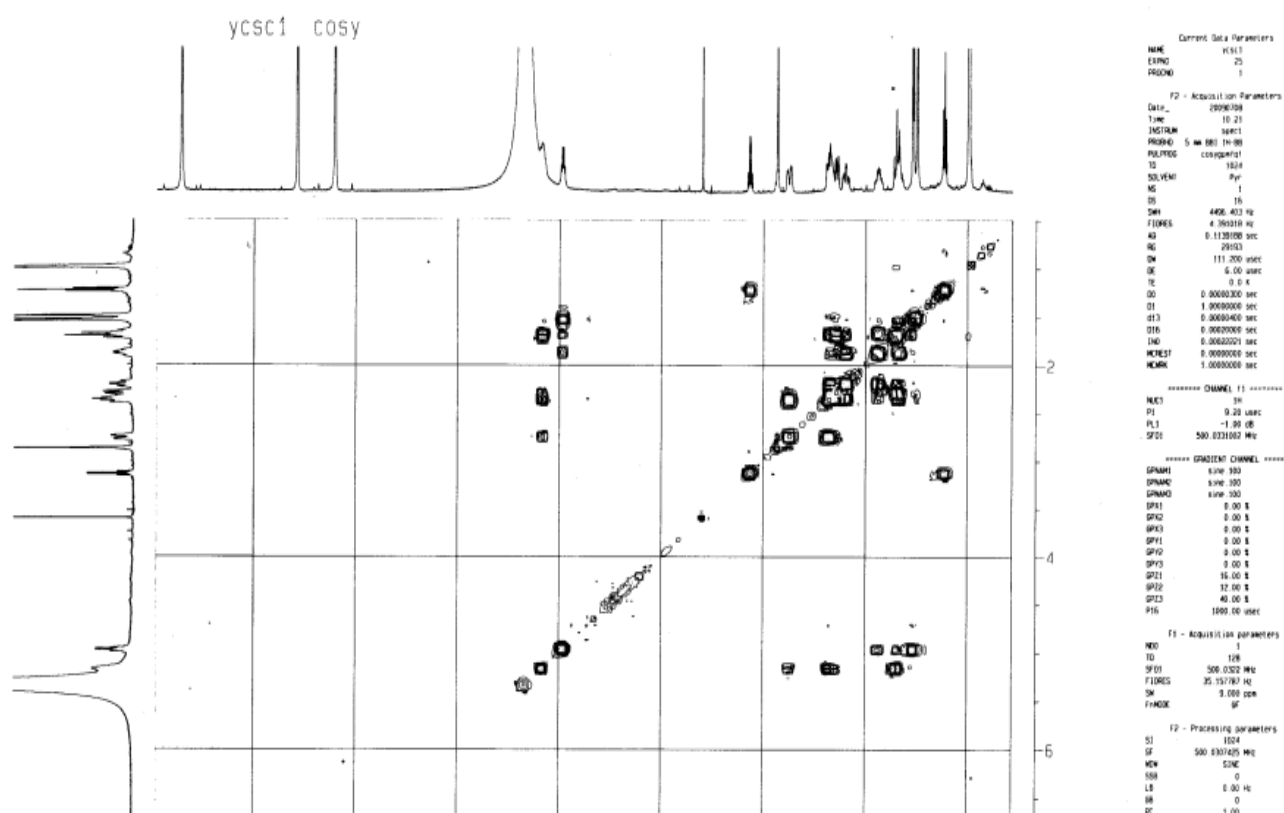

## HMBC

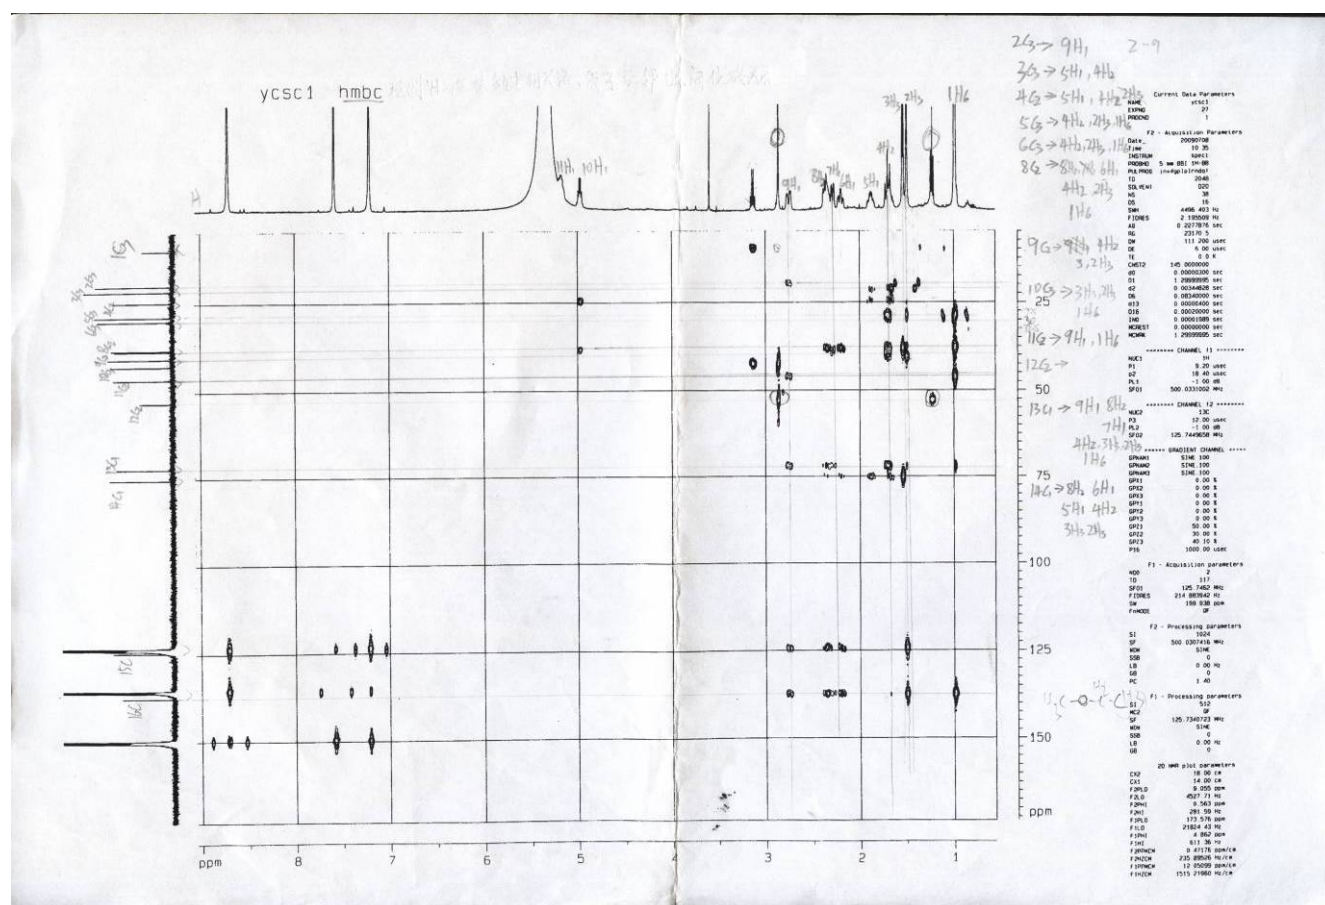

## HSQC

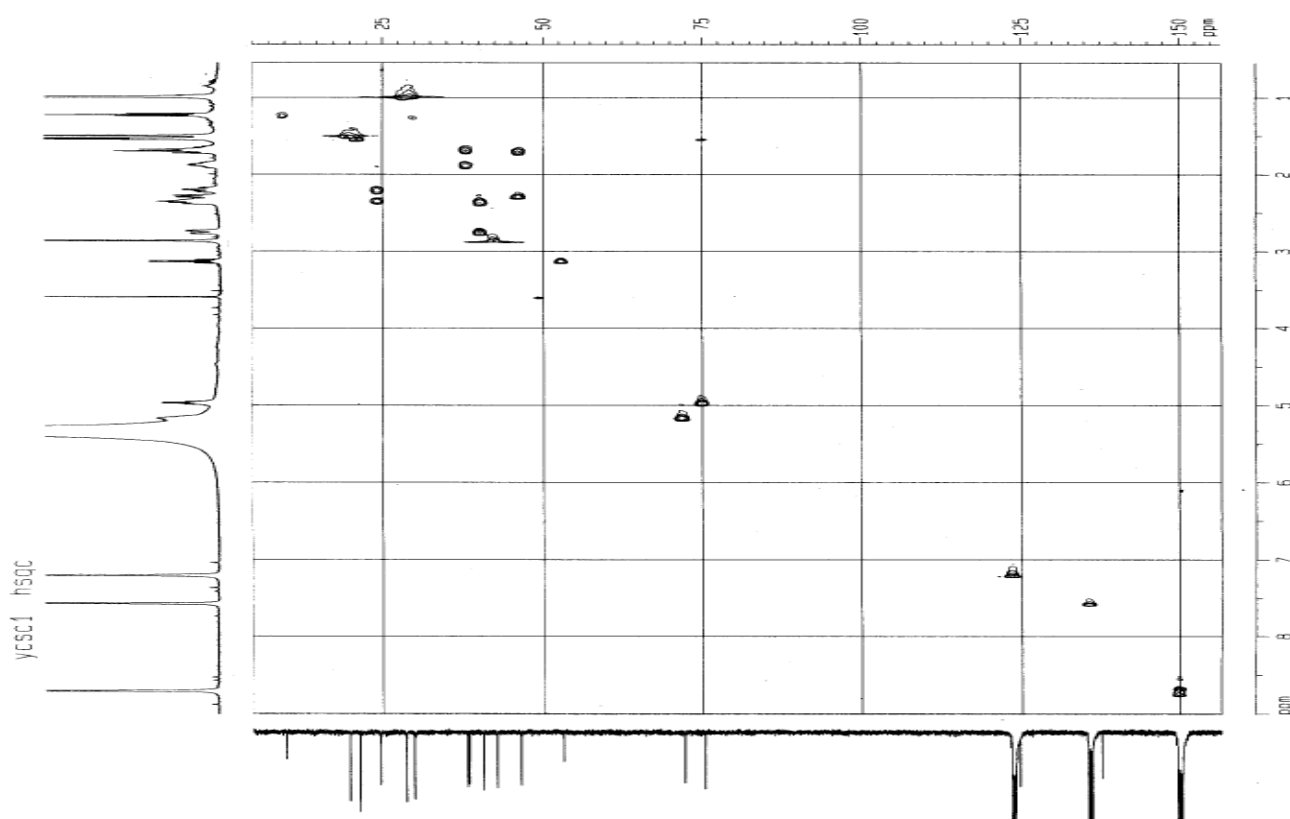

## HRTOFMS

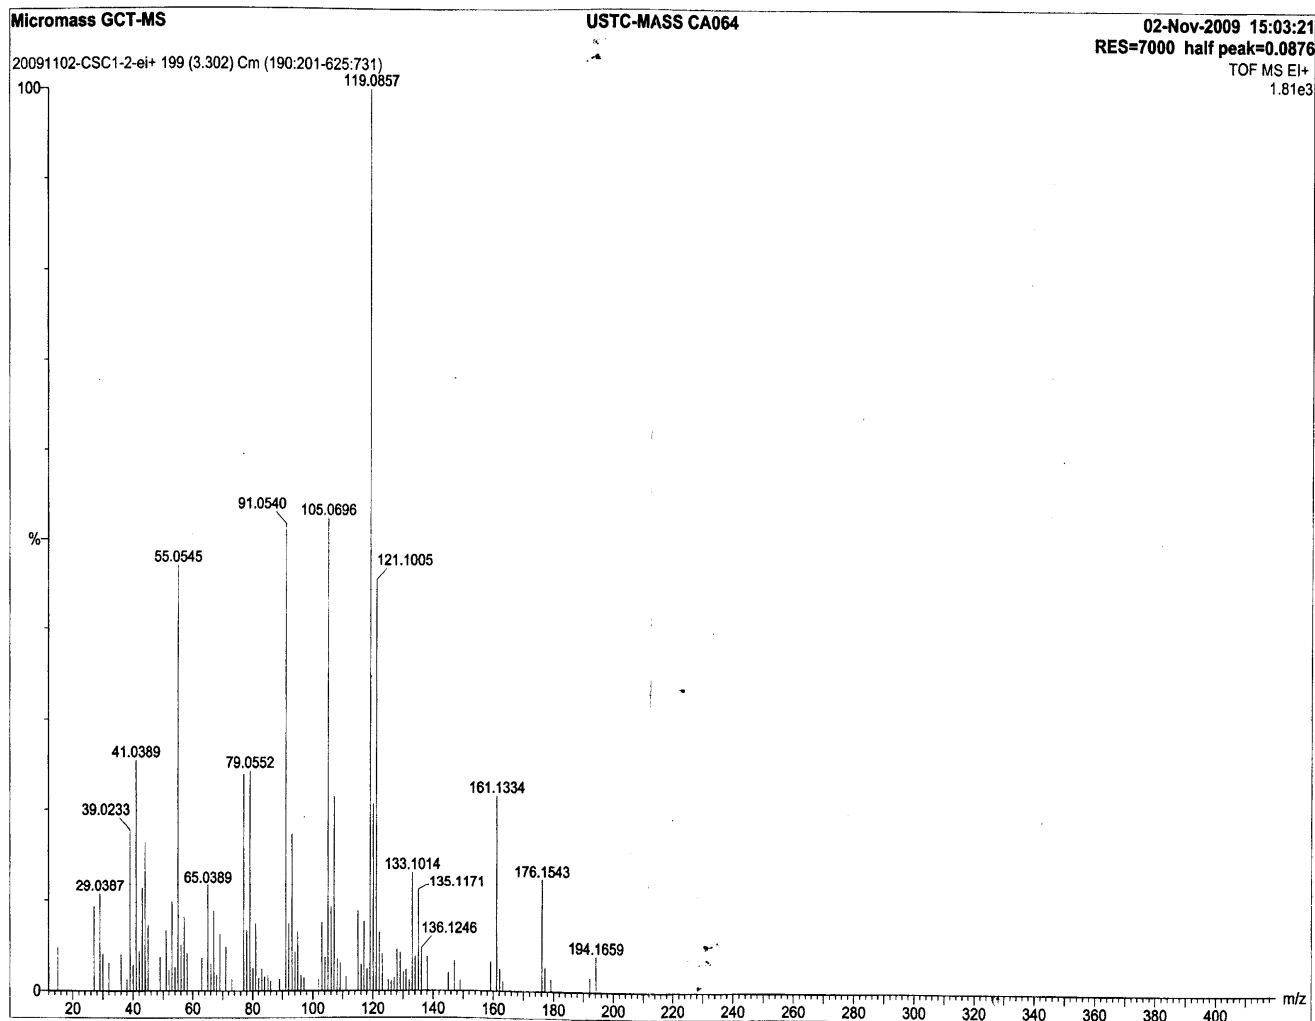

## Elemental Composition Report

Page 2

Multiple Mass Analysis: 96 mass(es) processed - displaying only valid results  
Tolerance = 8.0 mDa / DBE: min = -1.0, max = 50.0

Monoisotopic Mass, Odd and Even Electron Ions  
503 formula(e) evaluated with 85 results within limits (up to 50 closest results for each mass)

| Minimum: | 1.00   |            |      |       |      |           |
|----------|--------|------------|------|-------|------|-----------|
| Maximum: | 100.00 |            | 8.0  | 60.0  | -1.0 | 50.0      |
| Mass     | RA     | Calc. Mass | mDa  | PPM   | DBE  | Formula   |
| 131.0885 | 2.36   | 131.0861   | 2.4  | 18.5  | 5.5  | C10 H11   |
| 132.0935 | 1.12   | 132.0939   | -0.4 | -3.0  | 5.0  | C10 H12   |
| 133.1014 | 13.25  | 133.1017   | -0.3 | -2.4  | 4.5  | C10 H13   |
| 134.1101 | 3.75   | 134.1096   | 0.5  | 4.1   | 4.0  | C10 H14   |
| 135.1171 | 11.24  | 135.1174   | -0.3 | -2.0  | 3.5  | C10 H15   |
| 136.1246 | 4.75   | 136.1252   | -0.6 | -4.4  | 3.0  | C10 H16   |
| 138.1064 | 3.80   | 138.1045   | 1.9  | 14.0  | 3.0  | C9 H14 O  |
| 145.0971 | 2.01   | 145.1017   | -4.6 | -31.9 | 5.5  | C11 H13   |
| 147.1138 | 3.36   | 147.1174   | -3.6 | -24.3 | 4.5  | C11 H15   |
| 159.1180 | 3.24   | 159.1174   | 0.6  | 3.9   | 5.5  | C12 H15   |
| 161.1334 | 21.64  | 161.1330   | 0.4  | 2.3   | 4.5  | C12 H17   |
| 162.1366 | 2.40   | 162.1409   | -4.3 | -26.2 | 4.0  | C12 H18   |
| 163.1487 | 1.06   | 163.1487   | 0.0  | 0.1   | 3.5  | C12 H19   |
| 176.1543 | 12.36  | 176.1565   | -2.2 | -12.5 | 4.0  | C13 H20   |
| 177.1572 | 2.63   | 177.1643   | -7.1 | -40.2 | 3.5  | C13 H21   |
| 179.1387 | 1.29   | 179.1436   | -4.9 | -27.3 | 3.5  | C12 H19 O |
| 192.1509 | 1.57   | 192.1514   | -0.5 | -2.7  | 4.0  | C13 H20 O |
| 194.1659 | 3.91   | 194.1671   | -1.2 | -6.0  | 3.0  | C13 H22 O |
